# Supplementary material
Source: Springer Nature journal article supplement (https://www.springermedizin.de/resource/supplementary/13014_2009_232_MOESM4_ESM.pdf/9633230)

IL-6RA

IgG

RT50

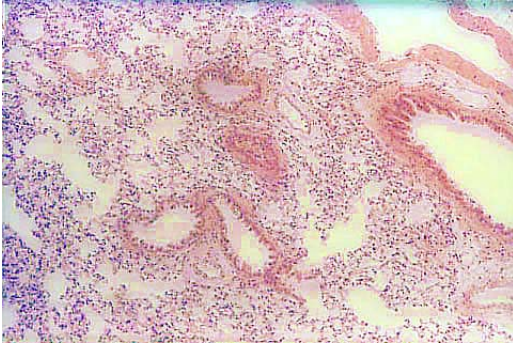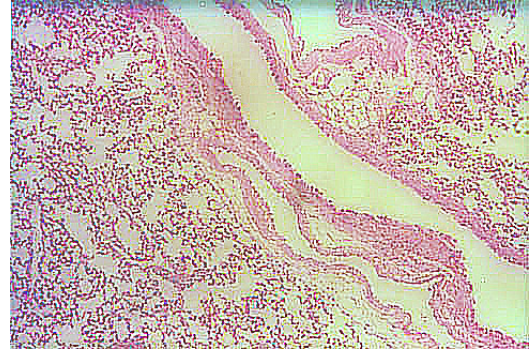

RT100

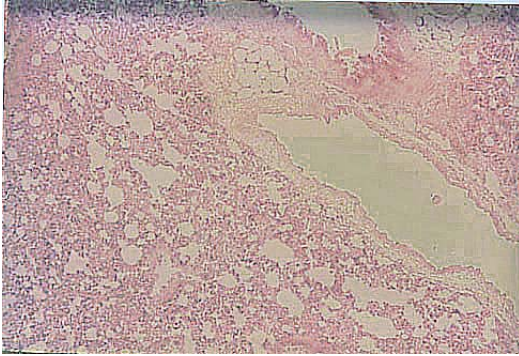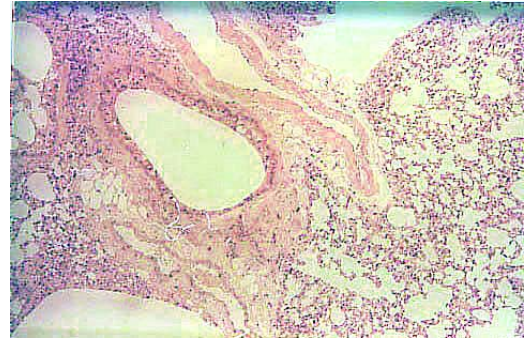

RT150

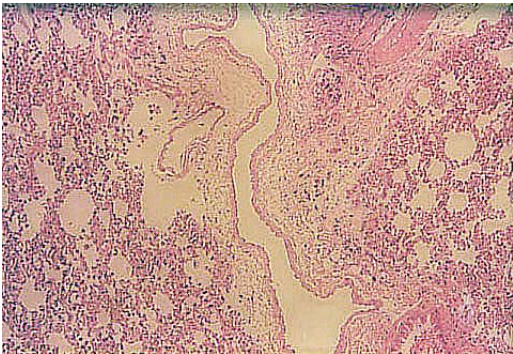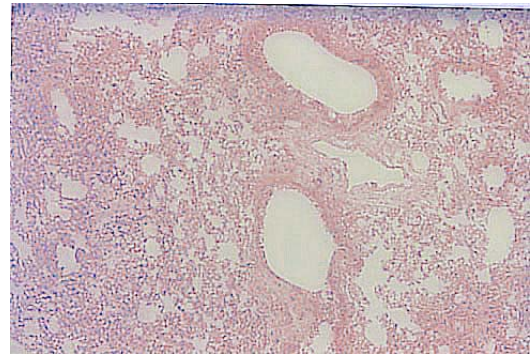

Supplement: MOESM4 [file 9633230]
